# Supplementary material for: A light-gated transcriptional recorder for detecting cell-cell contacts
Source: eLife. 2022 Mar 21;11:e70881. doi: 10.7554/eLife.70881 (PMC8937215; doi:10.7554/eLife.70881)
Supplement: Figure 1—source data 1. [file elife-70881-fig1-data1.xlsx]

## Sheet: Sheet1
1C Luminescence Data
CCR3- Dark	CCR3+ Dark	CCR3- Light	CCR3+ Light	CCR6- Dark	CCR6+ Dark	CCR6- Light	CCR6+ Light	CCR7- Dark	CCR7+ Dark	CCR7- Light	CCR7+ Light	GH- Dark	GH+ Dark	GH- Light	GH+ Light	Gn- Dark	Gn+ Dark	Gn- Light	Gn+ Light	Gc- Dark	Gc+ Dark	Gc- Light	Gc+ Light	tT- Dark	tT+ Dark	tT- Light	tT+ Light	blank DARK	blank LIGHT
0.4623	0.4206	0.7099	1.1435	2.1582	5.2637	3.8512	13.7758	2.213	8.6944	4.0886	10.3409	0.2592	0.0854	0.3155	0.3135	1.4621	1.066	1.8456	1.0555	5.177	5.5882	11.2805	13.5889	95.1632	104.245	92.2508	102.759	0.0832	0.0792
0.3597	0.4608	0.9553	1.0608	1.4095	5.2095	3.6391	12.832	2.1383	8.0408	4.5764	11.2015	0.2286	0.0855	0.2408	0.4584	1.6911	0.974	1.8646	1.3371	4.7633	5.7074	10.2552	13.3704	94.4123	104.502	93.3988	102.105	0.0912	0.0889
0.6699	0.3385	0.7468	1.1786	1.6084	5.0144	4.0864	12.9968	2.5349	8.0852	4.7173	10.0686	0.2986	0.1015	0.3258	0.363	1.7064	0.827	1.6895	1.0829	4.7713	5.4499	10.3638	13.2458	94.2978	105.298	87.2418	103.495	0.0906	0.0874
0.4223	0.372	0.856	1.0792	1.1974	4.8025	4.485	12.6129	2.1452	9.878	4.6459	11.0144	0.3515	0.1088	0.4262	0.3419	1.825	0.9718	1.7251	0.9407	5.2346	5.422	10.4303	12.9552	96.0242	103.884	91.2034	101.922	0.0819	0.0829
