# Supplementary material for: A light-gated transcriptional recorder for detecting cell-cell contacts
Source: eLife. 2022 Mar 21;11:e70881. doi: 10.7554/eLife.70881 (PMC8937215; doi:10.7554/eLife.70881)
Supplement: Figure 2—figure supplement 1—source data 1. [file elife-70881-fig2-figsupp1-data1.xlsx]

## Sheet: Sheet1
Figure 2 - figure supplement 1A Data					1B Data
Not expressed V5	Expressed no contact	Expressed contact			Bottom 50%	Top 50%
825.409	7204.96	1293.33			859.874	757.787
877.754	3874.48	1334.95			1845.32	516.768
803.245	4419.65	8997.98			6559.42	1619.47
621.043	5669.22	4603.91			5537.36	454.287
644.519	1718.56	8705.21			3051.84	1677.06
758.327	5830.57	5231.28			5699.3	1853.12
674.557	6840.77	3174.13			6033.11	3047.52
652.821	3395.91	14516.5			780.058	1631.9
619.346	3153.38	52353			1586.28	3891.36
703.811	1557.53	10515.3			5928.94	3118.03
688.898	1579.85	5936.1			1231.85	1337.67
660.438	1905.99	4081.76			1279.09	2812.27
708.606	2969.32	11182.2			770.826	589.987
605.118	2313.15	8172.26			5366.27	948.418
586.801	1277.8	2192.53			1485.11	1928.62
613.268	2106.28	12528.4			4734.76	2942.11
583.833	3065.24	7763.73			1206.66	1176.07
705.548	9587.19	4530.22			15669.1	2009.68
597.308	29089	1375.88			1152.05	2020.51
711.839	3919.73	3691.8			2593.96	1779.21
829.518	2421.81	2405.32			1089.44	1541.29
614.579	2717.62	3165.89			1376.14	1006.04
631.28	3706.64	1640.67			18842	6067.89
727.248	1961.65	722.082			3146.54	1241.33
723.833	1470.05	2829.72			2521.05	1129.31
566.405	12301.3	1739.61			1935.87	1357.87
681.721	1434.63	2791.87			1916.2	2620.56
585.193	39091.7	2342.8			4756.43	6093.45
552.383	2361.12	3324.25			2244.35	8700.11
604.391	2571.74	3698.5			9922.47	1650.39
611.273	2574.48	2173.4			822.497	4493.05
570.293	5746.89	2774			2601.38	717.875
674.142	3858.96	5495.63			2522.76	9282.28
607.758	3793.13	4995.58			1780.77	1922.43
592.399	12613.4	2673.02			4502.92	600.266
517.124	23274.6	1977.4			2031.85	792.865
598.136	2504.8	2247.07			5731.39	1412.43
775.316	1645.13	2162.67			3679.28	2910.2
738.962	2331.6	1200.75			783.584	483.805
964.164	1762.99	2383.28			2716.17	6546.48
620.854	1423.59	2501.5			3604.86	3663.91
588.62	2020.81	2868.83			686.927	696.531
568.212	2133.89	5390.03			2639.41	1442.07
623.953	3386.47	4099.44			3584.19	5729.68
551.502	1931.57	3391.01			532.917	1922.64
600.774	9287.49	623.54			3885.22	4630.38
561.533	3491.46	617.399			3153.08	6426.21
928.845	13217.7	1376.4			5232.41	1458.49
627.127	2663.23	4977.52			632.525	1271.15
670.906	1999.96	3827.94			1407.36	9323.99
	36168.3	2522.6			773.032	913.285
	23334.2	4010.51			4041.15	3444.13
	3972.61	4673.78			1708	897.928
	2955.79	8088.35
	6180.06	8963.73
	1385.1	2224.27
	1630.67	2583.51
	1671.61	7322.43
	3474.82	4441.84
	5632.76	6566.15
	7555.36	2433.18
	1648.93	1534.63
	3549.33	1848.39
	1962.26	1354.65
	4212.93	1045.62
	4836.73	2538.71
	2484.1	3633.26
	3364	1607.7
	4679.1	4881.62
	4239.02	9145.64
	7774.55	4198.17
	2402.34	3825.08
	2016.88	10883.7
	3710.88	1061.82
	2848.71	4416.64
	1399.75	10671.5
	1871.54	11488.8
	3858.5	2193.61
	1388.38	26610.2
	1507.2	13991.3
	4409.79	10430.5
	3679.88	7118.66
	4420.71	3411.16
	2840.94	1283.5
	20134.4	4405.43
	3946.48	5332.74
	6533.17	2646.2
	7761.88	996.106
	1842.02	6242.16
	10905.6	13691.1
	5027.81	3227.67
	6416.31	18791.1
	24131.3	1879.8
	5204.81	2321.85
	1907.44	9710.6
	1186.39	1073.52
	1784.47	1339.66
	11904.6	1470.52
	3474.53	3392.13
	3760.43	1918.38
	7472.76	2015.1
	4949.37	2180.51
	2742.3	2694.66
	3030.77	5648.94
	3791.28	24091.2
	1516.34	1975.07
	2537.06
	6050.04
