# Supplementary material for: A light-gated transcriptional recorder for detecting cell-cell contacts
Source: eLife. 2022 Mar 21;11:e70881. doi: 10.7554/eLife.70881 (PMC8937215; doi:10.7554/eLife.70881)
Supplement: Figure 2—source data 1. [file elife-70881-fig2-data1.xlsx]

## Sheet: Sheet1
2B Luminescence Data
-R-S Dark	-R+S Dark	-R-S Light	-R+S Light	+R-S Dark	+R+S Dark	+R-S Light	+R+S Light
0.0026	0.0027	0.0054	0.0045	0.4396	1.316	1.0987	6.6591
0.0022	0.0033	0.0031	0.0071	0.4449	1.0321	1.0189	6.0063
0.0013	0.0036	0.009	0.0087	0.2661	0.8341	1.5535	5.5315
0.0037	0.0024	0.0029	0.0064	0.4636	1.2775	0.7885	6.9958
2E Cell Count Data
No contact	Contact
0.00508746	0.0250007
-0.004148	0.00297163
0.0121771	0.00917882
0.0153503	-0.0051478
0.0616363	0.00052539
0.00856262	0.00863953
0.009129	0.514885
-0.0012516	0.362568
-0.0028608	0.123328
0.00126473	0.449315
0.0167247	0.229843
-0.0224014	0.336691
-0.0128488	0.232844
-0.0142882	0.439988
-0.0442381	0.038762
-0.0160628	0.0383334
-0.0119786	0.906419
0.00800862	0.0319033
0.0115085	0.040843
-0.0083689	0.838575
-0.0221435	1.81888
0.0206208	1.23567
0.0128694	0.999124
0.0701064	25.2693
0.0291957	3.2151
0.00363997	0.117066
-0.0782529	1.4944
0.0115925	1.44777
0.0274548	0.00780555
-0.0084653	0.722995
-0.0049043	1.2064
-0.0033145	0.867489
-0.0079443	0.0117845
-0.0137777	0.0326533
0.00363536	1.36106
0.00362436	0.860986
0.0108976	1.56706
-0.0377038	0.0284681
-0.0088099	1.09269
-0.0042965	0.183611
-0.057869	0.984679
-0.0273303	1.09619
-0.0211219	1.05659
-0.000671	0.894103
-0.0103045	0.829521
0.00624247	-92.019360*
-0.0086259	-9.889980*
0.00659971	1.40896
0.001868	0.614054
-0.0350404	0.93025
0.0140062	0.305494
0.0078566	0.651697
-0.0127154	1.41851
-0.0180359	0.0473362
-0.0055289	0.0512353
-0.0229884	0.400325
0.0713235	0.344266
0.0957731	0.252392
0.51926	0.164998
1.28988	0.174798
0.785452	0.0984982
0.0310243	0.159267
0.315941	0.620519
0.0978089	0.902535
0.0206871	2.36598
0.0304794	0.254788
0.147455	0.296513
0.139038	1.50083
0.0575036	0.276849
0.0864395	0.0109176
0.166634	0.00170866
0.0421224	0.352982
0.0623764	0.0973651
0.0164614	5.08384
0.735319	0.206477
0.228267	0.0279977
0.0792387	0.0472634
0.438766	1.81167
1.95114	0.0580188
0.160869	0.0505172
0.0200309	0.0321648
0.0286541	0.458154
1.35175	0.66963
0.392313	0.677946
0.0158083	0.239472
0.305607	0.00376346
0.216581	0.0448825
0.0242788	2.06171
0.0639171	0.163053
0.0154374	0.177682
0.022398	1.23561
0.0423321	0.332095
0.0501903	0.955434
0.0970918	0.576741
0.0292395	0.150249
0.0659554	1.74971
0.041275	0.997835
0.0365965	2.01606
0.164486	0.245587
0.31124	0.473004
0.107553	0.603565
0.118246	0.204846
0.452263	0.0287615
0.220461	0.232316
0.239606	0.188753
0.00029887	3.53283
0.0759561
0.407357
