# Supplementary material for: A light-gated transcriptional recorder for detecting cell-cell contacts
Source: eLife. 2022 Mar 21;11:e70881. doi: 10.7554/eLife.70881 (PMC8937215; doi:10.7554/eLife.70881)
Supplement: Figure 3—figure supplement 1—source data 1. [file elife-70881-fig3-figsupp1-data1.xlsx]

## Sheet: Sheet1
Figure 3 - figure supplement 1C Colocalization Data
Omit NRXN	CCL20-pre-mGRASP
19	69
21	68
20	72
1E Luminescence Data
-R-S Dark	-R+S Dark	-R-S Light	-R+S Light	+R-S Dark	+R+S Dark	+R-S Light	+R+S Light
0.358145	0.39361	0.27956	0.3522	0.28295	0.361515	0.639115	8.16014
0.388385	0.357495	0.379035	0.39753	0.48577	0.312535	1.24542	5.64889
0.26183	0.43884	0.45923	0.25916	0.305935	0.27967	1.61957	7.30394
0.30703	0.278945	0.351115	0.4045	0.38884	0.35546	1.16517	7.64094
