# Supplementary material for: A light-gated transcriptional recorder for detecting cell-cell contacts
Source: eLife. 2022 Mar 21;11:e70881. doi: 10.7554/eLife.70881 (PMC8937215; doi:10.7554/eLife.70881)
Supplement: Figure 3—source data 1. [file elife-70881-fig3-data1.xlsx]

## Sheet: Sheet1
3B Luminescence Data
-R-S Dark	-R+S Dark	-R-S Light	-R+S Light	+R-S Dark	+R+S Dark	+R-S Light	+R+S Light
0.5175	0.516167	0.6825	0.484	0.7245	1.00067	1.04133	10.7988
0.3955	0.437667	0.4275	0.598333	0.566333	0.758833	1.44733	9.42783
0.296	0.3245	0.549	0.580333	0.4205	0.677333	1.00683	7.42283
0.339	0.284667	0.4875	0.616	0.343	0.7365	1.29333	8.41633
3D Luminescence Data
-R-S Dark	-R+S Dark	-R-S Light	-R+S Light	+R-S Dark	+R+S Dark	+R-S Light	+R+S Light
0.0092	0.0108	0.0189	0.0222	1.0172	2.8029	3.1912	12.2433
0.0066	0.0112	0.0149	0.0208	1.2197	3.2103	3.3723	11.1803
0.0072	0.0181	0.0167	0.0197	1.2558	2.6919	3.5829	10.3633
0.0058	0.0103	0.0162	0.017	1.0491	2.0842	3.3649	11.9736
