# Supplementary material for: A light-gated transcriptional recorder for detecting cell-cell contacts
Source: eLife. 2022 Mar 21;11:e70881. doi: 10.7554/eLife.70881 (PMC8937215; doi:10.7554/eLife.70881)
Supplement: Figure 4—figure supplement 1—source data 1. [file elife-70881-fig4-figsupp1-data1.xlsx]

## Sheet: Sheet1
Figure 4 - fiure supplement 1 Data
WT TEV + eLOV	uTEV1 + eLOV	uTEV2 + eLOV	WT TEV + hLOV	uTEV1 + hLOV	uTEV2 + hLOV
0.0412371	0.0957447	0.153409	0.001	0.0353982	0.0528846
1A Data Cell Counts
WT eLOV	utev1 elov	utev2 elov	WT hlov	utev1 hlov	utev2 hlov
4	18	27	0	4	11
22	56	60	68	34	62
46	67	54	69	40	69
29	65	62	53	39	77
97	188	176	190	113	208
0.0412371	0.0957447	0.153409	0	0.0353982	0.0528846
1B Data Ratios
Dark –Sender	Dark +Sender	Light –Sender	Light +Sender
0.151719	0.415523	0.021802	0.0495433
0.108906	0.0473821	0.0434069	1.61895
0.0201116	0.020625	0.0561315	1.38356
0.0241566	0.116227	0.0695338	1.69518
0.0434035	0.0182374	0.022013	0.399055
0.0148437	-0.00320726	0.0154631	6.27945
0.0386189	0.0424298	0.0509106	0.0841759
0.118528	0.0113305	0.0691759	1.40184
0.0369697	0.0503737	0.0878321	2.36238
0.0095984	0.037953	0.03182	0.00360548
	0.0618512	0.0650786	0.00521794
	0.0701701	0.13341	-0.0348912
	0.0300726	0.0782114	0.780143
	0.056638	0.0520622	0.02125
	0.14988	0.0244443	0.0407946
	0.0196029	-0.000387	1.30425
	0.0299105	0.0549259	0.0415502
	-0.0087962		2.10847
			2.5441
			0.0127649
			0.00116624
			0.0272436
			0.0445677
			0.036236
			0.0245336
			1.98042
			0.115708
			0.102356
			0.54614
			0.301949
			1.33707
			0.257251
			0.066668
			0.421719
			0.123686
